# Supplementary material
Source: PubMed Central journal article supplement (PMC2715524)
Supplement: 0905441106_0905441106SI.pdf [file 0905441106_0905441106SI.pdf]

# Supporting Information

Kono et al. 10.1073/pnas.0905441106

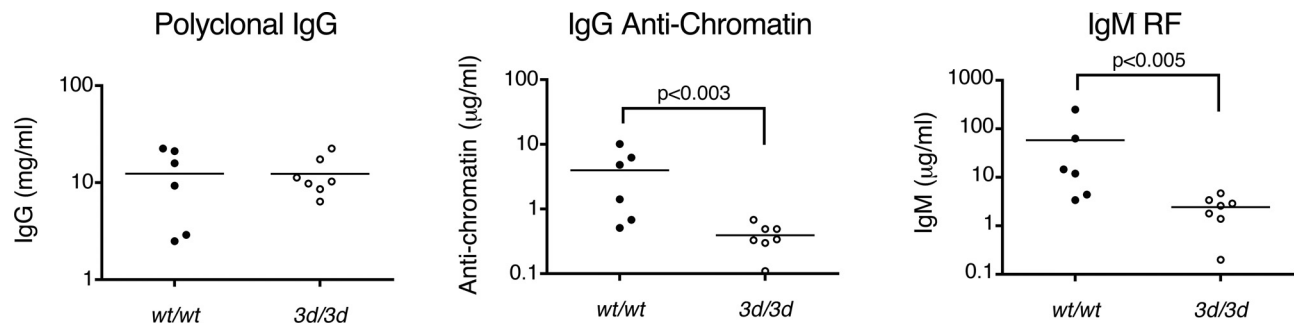

**Fig. S1.** IgG polyclonal and autoAbs from 14- to 15-month-old B6-*Fas*<sup>lpr</sup> mice. IgG concentrations in serum were determined by ELISA in wild-type (*wt/wt*) and mutant (*3d/3d*) mice. IgM RF was anti-IgG1.



**Table S2. Lymph node and spleen T cell populations in young and old B6-*Fas<sup>lpr</sup>* 3d mice**

| Unc93b1            | Body (g)       | Organ (mg)    | Cell no. ( $\times 10^6$ ) | T cells (%)    | CD4 (%)        | CD8 (%)        | DN (%)         | CD8 CD62L <sup>+</sup> (%) | CD8 CD44 <sup>hi</sup> (%) |
|--------------------|----------------|---------------|----------------------------|----------------|----------------|----------------|----------------|----------------------------|----------------------------|
| <b>Spleen</b>      |                |               |                            |                |                |                |                |                            |                            |
| Young <i>wt</i>    | 11.0 $\pm$ 0.7 | 49 $\pm$ 5    | 33.3 $\pm$ 5.2             | 22.0 $\pm$ 1.0 | 52.9 $\pm$ 0.6 | 32.1 $\pm$ 0.1 | 13.6 $\pm$ 0.6 | 92.7 $\pm$ 0.4             | 41.1 $\pm$ 2.8             |
| Young <i>3d</i>    | 13.4 $\pm$ 0.3 | 46 $\pm$ 3    | 25.3 $\pm$ 3.7             | 25.7 $\pm$ 1.9 | 54.5 $\pm$ 0.5 | 30.3 $\pm$ 0.6 | 14.0 $\pm$ 0.6 | 93.7 $\pm$ 0.4             | 28.9 $\pm$ 0.7             |
| <i>P</i> -value    | 0.02           |               |                            |                |                | 0.01           |                |                            | <0.0001                    |
| Old <i>wt</i>      | 23.9 $\pm$ 1.1 | 340 $\pm$ 90  | 103.4 $\pm$ 32.2           | 36.8 $\pm$ 2.  | 51.6 $\pm$ 3.3 | 23.2 $\pm$ 3.4 | 23.4 $\pm$ 1.4 | 18.0 $\pm$ 4.3             | 85.8 $\pm$ 3.3             |
| Old <i>3d</i>      | 29.7 $\pm$ 1.5 | 90 $\pm$ 10   | 48.9 $\pm$ 4.5             | 18.8 $\pm$ 1.3 | 46.2 $\pm$ 3.1 | 24.2 $\pm$ 3.4 | 28.0 $\pm$ 2.1 | 34.7 $\pm$ 4.9             | 80.7 $\pm$ 6.0             |
| <i>P</i> -value    | 0.007          | 0.01          | 0.07                       | <0.0001        |                |                |                | 0.03                       |                            |
| <b>Lymph nodes</b> |                |               |                            |                |                |                |                |                            |                            |
| Young <i>wt</i>    |                | 19 $\pm$ 3    | 4.3 $\pm$ 0.9              | 69.8 $\pm$ 1.7 | 56.1 $\pm$ 1.0 | 40.2 $\pm$ 0.9 | 2.4 $\pm$ 0.2  | 95.3 $\pm$ 0.4             | 22.0 $\pm$ 2.7             |
| Young <i>3d</i>    |                | 21 $\pm$ 2    | 8.4 $\pm$ 1.6              | 64.1 $\pm$ 2.1 | 54.6 $\pm$ 0.4 | 38.3 $\pm$ 3.2 | 3.2 $\pm$ 0.2  | 96.5 $\pm$ 0.3             | 14.3 $\pm$ 0.9             |
| <i>P</i> -value    |                |               |                            |                |                |                |                |                            | 0.0005                     |
| Old <i>wt</i>      |                | 596 $\pm$ 175 | 105 $\pm$ 32               | 71.1 $\pm$ 4.1 | 37.6 $\pm$ 2.3 | 19.6 $\pm$ 3.1 | 40.3 $\pm$ 5.1 | 41.3 $\pm$ 6.8             | 76.5 $\pm$ 3.8             |
| Old <i>3d</i>      |                | 310 $\pm$ 68  | 113 $\pm$ 27               | 66.4 $\pm$ 3.4 | 12.9 $\pm$ 1.4 | 10.4 $\pm$ 1.9 | 74.1 $\pm$ 2.7 | 68.2 $\pm$ 6.1             | 66.4 $\pm$ 4.2             |
| <i>P</i> -value    |                |               |                            |                | <0.0001        | 0.02           | <0.0001        | 0.01                       |                            |

LN includes cervical, axillary, inguinal, and mesenteric. CD4, CD8, and DN T cell data are expressed as a percentage of T cells; CD62L<sup>+</sup> and CD44<sup>hi</sup> subsets are the percentage of CD8 T cells. Young mice were 25–29 days old,  $n = 4$ /group. Old mice were 14.5–15.1 months old,  $n = 6$ –7/group. *P*-values < 0.05 are shown

Table S3. Splenic B cell populations in young and old B6-Fas<sup>lpr</sup> 3d mice

| Unc93b1         | B cells (%) | B cells (no.) | Follicular<br>CD21 <sup>lo</sup> CD23 <sup>hi</sup><br>(%) | Marginal zone<br>CD21 <sup>hi</sup> CD23 <sup>lo</sup><br>(%) | CD21 <sup>lo</sup> CD23 <sup>lo</sup><br>total (%) | CD21 <sup>lo</sup> CD23 <sup>lo</sup><br>IgM <sup>-</sup> subset (%) | Plasma cells<br>CD138 <sup>+</sup> B220 <sup>-</sup><br>(%) |
|-----------------|-------------|---------------|------------------------------------------------------------|---------------------------------------------------------------|----------------------------------------------------|----------------------------------------------------------------------|-------------------------------------------------------------|
| Young wt        | 58.2 ± 0.7  | 19.4 ± 3.2    | 64.9 ± 0.8                                                 | 3.8 ± 0.2                                                     | 27.2 ± 0.3                                         | 17.1 ± 1.1                                                           | 2.4 ± 0.2                                                   |
| Young 3d        | 57.8 ± 1.1  | 14.6 ± 2.2    | 72.9 ± 1.2                                                 | 4.3 ± 0.2                                                     | 19.9 ± 1.3                                         | 17.5 ± 0.1                                                           | 2.6 ± 0.2                                                   |
| <i>P</i> -value |             |               | 0.0007                                                     |                                                               | 0.0006                                             |                                                                      |                                                             |
| Old wt          | 19.6 ± 5.0  | 24.1 ± 11.6   | 32.5 ± 7.7                                                 | 15.3 ± 5.5                                                    | 45.4 ± 13.8                                        | 51.9 ± 7.4                                                           | 8.6 ± 2.8                                                   |
| Old 3d          | 63.2 ± 4.1  | 31.6 ± 4.1    | 66.3 ± 3.1                                                 | 15.9 ± 2.2                                                    | 10.6 ± 2.8                                         | 37.2 ± 3.9                                                           | 3.0 ± 0.8                                                   |
| <i>P</i> -value | 0.00002     |               | 0.0005                                                     |                                                               | 0.01                                               | 0.06                                                                 | 0.03                                                        |

Follicular, marginal zone, and CD21<sup>lo</sup>CD23<sup>lo</sup> subsets are expressed as a percentage of B cells; IgM<sup>-</sup> cells are shown as a percentage of the CD21<sup>lo</sup>CD23<sup>lo</sup> subset. For young mice, calculated numbers of CD21<sup>lo</sup>CD23<sup>lo</sup> B cells per spleen were significantly greater in wt mice ( $5.3 \pm 0.9$  versus  $2.9 \pm 0.3 \times 10^6$  cells/spleen,  $P = 0.025$ ), while numbers of follicular B cells were not significantly different ( $12.5 \pm 1.9$  versus  $10.7 \pm 1.7 \times 10^6$  cells/spleen,  $P = 0.5$ ). See Table S2 legend for ages and number of mice.

**Table S4. ANA in male BXS<sup>B</sup> 3d mice**

| <i>Unc93b1</i> | Age (mo) | ANA                    |
|----------------|----------|------------------------|
| <i>wt/wt</i>   | 2.1      | 2 + Fine Spk, Meta +   |
| <i>wt/wt</i>   | 2.1      | 2–3 + Fine Spk, Meta + |
| <i>wt/wt</i>   | 2.6      | 1 + Fine Spk           |
| <i>wt/wt</i>   | 2.6      | 1–2 + Fine Spk         |
| <i>3d/3d</i>   | 2.6      | Neg                    |
| <i>3d/3d</i>   | 3.0      | Neg                    |
| <i>3d/3d</i>   | 3.3      | Neg                    |
| <i>3d/3d</i>   | 3.6      | Neg                    |
| <i>3d/3d</i>   | 4.3      | Neg                    |
| <i>3d/3d</i>   | 4.5      | Neg                    |
| <i>3d/3d</i>   | 6.0      | Neg                    |
| <i>3d/3d</i>   | 7.1      | Neg                    |

ANA staining was performed with 1/100 serum dilution and anti-IgG-FITC. All positive nuclear staining patterns are consistent with anti-chromatin. Meta, metaphase; Spk, speckled; Neg, negative.

**Table S5. ANA in B6-*Fas<sup>lpr</sup>* 3d mice treated with lipid A**

| Lipid A treated | Age (mo) | ANA                        |
|-----------------|----------|----------------------------|
| <i>wt/wt</i>    | 3.2      | 1–2 + Fine Spk, Meta +*    |
| <i>wt/wt</i>    | 4.1      | 2–3 + Fine Spk, Meta +*    |
| <i>wt/wt</i>    | 5.5      | 4 + Homog (strong), Meta + |
| <i>wt/wt</i>    | 5.5      | 4 + Homog (strong), Meta + |
| <i>3d/3d</i>    | 6.0      | Neg                        |
| <i>3d/3d</i>    | 6.0      | Neg                        |
| <i>3d/3d</i>    | 6.1      | Neg                        |

ANA staining was performed with 1/100 serum dilution and anti-IgG-FITC. All positive nuclear staining patterns are consistent with anti-chromatin. Lipid A was administered twice weekly for 2 months. Homog, homogeneous; Meta, metaphase; Spk, speckled; Neg, negative.

\*Two lipid A-treated *wt* mice had early mortality requiring measurement of serum samples drawn at earlier time points.
